# Supplementary material
Source: ML conference proceedings conference paper supplement (https://openaccess.thecvf.com/content/ICCV2021/html/Dittadi_Full-Body_Motion_From_ICCV_2021_paper.html)
Supplement: Supplementary file 1 [file Dittadi_Full-Body_Motion_From_ICCV_2021_supplemental.zip]

Archive with 2 entries (2 files):
- Full_Body_Motion_from_a_Single_HMD_appendix.pdf
- Full_Body_Motion_from_a_Single_HMD_video.mp4
